# Supplementary material for: Prevalence of autoimmune diseases and other associated conditions in children and young adults with juvenile idiopathic arthritis
Source: HighWire-hosted journal article supplement (doi:10.1136/rmdopen-2020-001435), 2021-03-01
Supplement: rmdopen-2020-001435supp001_data_supplement.pdf [file rmdopen-2020-001435supp001_data_supplement.pdf]

## Supplemental Appendix

**Supplemental Table S1** ICD-9 and ICD-10 codes for JIA and the 26 pre-specified co-existing autoimmune diseases and associated conditions

| Disease                            | ICD-9 code(s) | ICD-10 code(s)               |
|------------------------------------|---------------|------------------------------|
| <b>Autoimmune Diseases</b>         |               |                              |
| Addison disease                    | 255.4         | E27.1, E27.2, E27.40, E27.49 |
| Alopecia areata                    | 704.01        | L63.2, L63.8                 |
| Autoimmune/Hashimoto's thyroiditis | 245.2         | E06.3                        |
| Graves' disease                    | 242.0         | E05.00, E05.01               |
| Morphoea                           | 701.0         | L90.0, L94.0, L94.3          |
| Multiple sclerosis                 | 340.XX        | G35                          |
| Myasthenia gravis                  | 358.00        | G70.00                       |
| Pernicious anaemia                 | 281.0         | D51.0                        |
| Primary biliary cirrhosis          | 571.6         | M60.9, M79.1, M79.7          |

|                              |                |                                                                                                                                                                                                                                                                                   |
|------------------------------|----------------|-----------------------------------------------------------------------------------------------------------------------------------------------------------------------------------------------------------------------------------------------------------------------------------|
| Takayasu arteritis           | 446.7          | M31.4                                                                                                                                                                                                                                                                             |
|                              |                | E10.9, E10.65, E10.10, E10.65, E10.69,<br>E10.11, E10.641, E10.29, E10.21,<br>E10.311, E10.319, E10.36, E10.37X1,<br>E10.37X2, E10.37X3, E10.37X9, E10.39,<br>E10.40, E10.51, E10.618, E10.620,<br>E10.621, E10.622, E10.628, E10.630,<br>E10.638, E10.649, E10.65, E10.69, E10.8 |
| Type 1 diabetes mellitus     | 250.X1, 250.X3 |                                                                                                                                                                                                                                                                                   |
| Vitiligo                     | 709.01         | L80                                                                                                                                                                                                                                                                               |
| <b>Associated Conditions</b> |                |                                                                                                                                                                                                                                                                                   |
| Autoimmune disease NEC       | 279.4          | D89.82, D89.89                                                                                                                                                                                                                                                                    |
| Chronic glomerulonephritis   | 582.XX         | N03.2, N03.3, N03.5, N03.8, N03.9, N08<br>L50.0, L50.1, L50.2, L50.3, L50.4, L50.5,<br>L50.6, L50.8, L50.9                                                                                                                                                                        |
| Chronic urticaria            | 708.XX         |                                                                                                                                                                                                                                                                                   |

|                                      |               |                                                                                                |
|--------------------------------------|---------------|------------------------------------------------------------------------------------------------|
|                                      |               | H15.009, H15.109, H15.119, H15.129,<br>H15.019, H15.059, H15.049, H15.029,<br>H15.039, H15.099 |
| Episcleritis/scleritis               | 379.0X        |                                                                                                |
| Erythema nodosum                     | 695.2         | L52                                                                                            |
|                                      |               | D59.0, D59.1, D59.4, D59.3, D59.5,<br>D59.6, D59.8, D59.9                                      |
| Haemolytic anaemia                   | 283.XX        |                                                                                                |
| Immune thrombocytopenia              |               |                                                                                                |
| purpura                              | 287.31        | D69.3                                                                                          |
| Leukocytoclastic vasculitis          | 446.29        | M31.0                                                                                          |
| Myositis                             | 729.1         | M60.9, M79.1, M79.7                                                                            |
| Pulmonary fibrosis/interstitial lung |               |                                                                                                |
| disease                              | 515.X, 516.31 | J84.10, J84.89                                                                                 |
| Raynaud's syndrome                   | 443.0         | I73.00                                                                                         |
| Sjögren's syndrome/sicca             |               |                                                                                                |
| syndrome                             | 710.2         | M35.00, M35.01                                                                                 |
| Thrombocytopenia purpura             | 287.30        | D69.49                                                                                         |

---

|            |                                       |                                    |
|------------|---------------------------------------|------------------------------------|
| Vasculitis | 447.6                                 | I77.6                              |
|            |                                       | M08.0, M08.1, M08.2, M08.3, M04.4, |
| JIA        | 714.30, 714.31, 714.32, 714.33, 714.2 | M08.8, M08.9                       |

---

ICD-9, International Classification of Diseases, Ninth Revision; ICD-10, International Classification of Diseases, Tenth

Revision; JIA, juvenile idiopathic arthritis; NEC, not elsewhere classified.

**Supplemental Table S2** Autoimmune and associated diseases according to JIA subcategory

| Disease                    | Polyarticular           |                      |                  | Enthesitis-     |                   |                          | Polyarticular       |               |
|----------------------------|-------------------------|----------------------|------------------|-----------------|-------------------|--------------------------|---------------------|---------------|
|                            | Oligoarticular<br>n=360 | RF-negative<br>n=320 | Systemic<br>n=90 | related<br>n=88 | Psoriatic<br>n=72 | Undifferentiated<br>n=65 | RF-positive<br>n=30 | JIA<br>n=1333 |
| <b>Autoimmune Diseases</b> |                         |                      |                  |                 |                   |                          |                     |               |
| Addison disease            | 0                       | 0                    | 8 (8.89%)        | 0               | 0                 | 0                        | 0                   | 11 (0.83%)    |
| Alopecia areata            | 0                       | 0                    | 0                | 0               | 0                 | 0                        | 0                   | 0             |
| Autoimmune/                |                         |                      |                  |                 |                   |                          |                     |               |
| Hashimoto's thyroiditis    | 5 (1.39%)               | 6 (1.88%)            | 0                | 1 (1.14%)       | 1 (1.39%)         | 0                        | 0                   | 16 (1.2%)     |
| Graves' disease            | 0                       | 0                    | 0                | 0               | 0                 | 0                        | 0                   | 1 (0.08%)     |
| Morphoea                   | 2 (0.56%)               | 5 (1.56%)            | 0                | 0               | 0                 | 0                        | 0                   | 12 (0.9%)     |
| Multiple sclerosis         | 0                       | 0                    | 0                | 0               | 0                 | 0                        | 0                   | 1 (0.08%)     |
| Myasthenia gravis          | 0                       | 0                    | 0                | 0               | 0                 | 0                        | 0                   | 0             |
| Pernicious anaemia         | 0                       | 0                    | 0                | 0               | 0                 | 0                        | 0                   | 0             |
| Primary biliary            |                         |                      |                  |                 |                   |                          |                     |               |
| cirrhosis                  | 0                       | 0                    | 0                | 0               | 0                 | 0                        | 0                   | 0             |
| Takayasu arteritis         | 0                       | 1 (0.31%)            | 0                | 0               | 0                 | 0                        | 0                   | 1 (0.08%)     |
| Type 1 diabetes            |                         |                      |                  |                 |                   |                          |                     |               |
| mellitus                   | 4 (1.11%)               | 6 (1.88%)            | 1 (1.11%)        | 2 (2.27%)       | 1 (1.39%)         | 0                        | 2 (6.67%)           | 17 (1.28%)    |
| Vitiligo                   | 0                       | 2 (0.63%)            | 1 (1.11%)        | 1 (1.14%)       | 0                 | 0                        | 0                   | 5 (0.38%)     |

| <b>Associated Conditions</b> |             |            |           |           |           |           |           |              |
|------------------------------|-------------|------------|-----------|-----------|-----------|-----------|-----------|--------------|
| Autoimmune disease           |             |            |           |           |           |           |           |              |
| NEC                          | 0           | 1 (0.31%)  | 1 (1.11%) | 1 (1.14%) | 1 (1.39%) | 0         | 0         | 8 (0.6%)     |
| Chronic                      |             |            |           |           |           |           |           |              |
| glomerulonephritis           | 0           | 0          | 0         | 0         | 0         | 0         | 0         | 1 (0.08%)    |
| 14                           |             |            |           |           |           |           |           |              |
| Chronic urticaria            | 11 (3.06%)  | 7 (2.19%)  | (15.56%)  | 2 (2.27%) | 0         | 5 (7.69%) | 1 (3.33%) | 49 (3.68%)   |
| Episcleritis/scleritis       | 0           | 1 (0.31%)  | 1 (1.11%) | 1 (1.14%) | 0         | 1 (1.54%) | 0         | 5 (0.38%)    |
| Erythema nodosum             | 1 (0.28%)   | 0          | 0         | 0         | 0         | 0         | 0         | 1 (0.08%)    |
| Haemolytic anaemia           | 1 (0.28%)   | 0          | 0         | 0         | 0         | 0         | 0         | 1 (0.08%)    |
| Immune                       |             |            |           |           |           |           |           |              |
| thrombocytopenia             |             |            |           |           |           |           |           |              |
| purpura                      | 1 (0.28%)   | 0          | 1 (1.11%) | 0         | 0         | 0         | 0         | 2 (0.15%)    |
| Leukocytoclastic             |             |            |           |           |           |           |           |              |
| vasculitis                   | 0           | 0          | 0         | 1 (1.14%) | 0         | 0         | 0         | 2 (0.15%)    |
| 16      17                   |             |            |           |           |           |           |           |              |
| Myositis                     | 37 (10.28%) | 23 (7.19%) | (17.78%)  | (19.32%)  | 7 (9.72%) | 6 (9.23%) | 1 (3.33%) | 135 (10.14%) |
| Pulmonary                    |             |            |           |           |           |           |           |              |
| fibrosis/interstitial lung   |             |            |           |           |           |           |           |              |
| disease                      | 1 (0.28%)   | 1 (0.31%)  | 5 (5.56%) | 0         | 0         | 0         | 0         | 15 (1.13%)   |

|                                   |           |           |           |           |   |           |   |            |
|-----------------------------------|-----------|-----------|-----------|-----------|---|-----------|---|------------|
| Raynaud's syndrome                | 0         | 5 (1.56%) | 0         | 2 (2.27%) | 0 | 3 (4.62%) | 0 | 19 (1.43%) |
| Sjögren's syndrome/sicca syndrome | 0         | 2 (0.63%) | 0         | 0         | 0 | 1 (1.54%) | 0 | 3 (0.23%)  |
| Thrombocytopenia purpura          | 1 (0.28%) | 0         | 0         | 0         | 0 | 0         | 0 | 1 (0.08%)  |
| Vasculitis                        | 0         | 2 (0.63%) | 1 (1.11%) | 2 (2.27%) | 0 | 0         | 0 | 8 (0.6%)   |

JIA, juvenile idiopathic arthritis; NEC, not elsewhere classified; RF, rheumatoid factor.
